# Supplementary material for: An asymmetrical Zr2CO/VSe2 heterostructure as an efficient electrocatalyst for the hydrogen evolution reaction
Source: Royal Society of Chemistry journal article supplement (doi:10.1039/d4nj00906a), 2024-01-01
Supplement: d4nj00906a1.pdf [file d4nj00906a1.pdf]

## Supplementary Information (SI)

# Asymmetrical $Zr_2CO_3/VSe_2$ Heterostructure as Efficient Electrocatalysts for Hydrogen Evolution Reaction

Jisong Hu,<sup>a</sup> Xiangyu Liu,<sup>b</sup> Jiahao Wang,<sup>b</sup> Jinxuan Jin,<sup>b</sup> Ming Ouyang,<sup>b</sup> Moshang Fan,<sup>a</sup> Rui Zhang,<sup>c</sup> Xiao Ji<sup>a</sup>, Ling Miao\*<sup>a</sup> and Jianjun Jiang<sup>a</sup>

<sup>a</sup> School of Optical and Electronic Information, Huazhong University of Science and Technology, Luoyu Road 1037, Wuhan, 430074, PR China. E-mail: miaoling@hust.edu.cn

<sup>b</sup> School of Integrated Circuits, Huazhong University of Science and Technology, Luoyu Road 1037, Wuhan, 430074, PR China

<sup>c</sup> School of Chemical and Environmental Engineering, Shanghai Institute of Technology, Shanghai, 201418, PR China

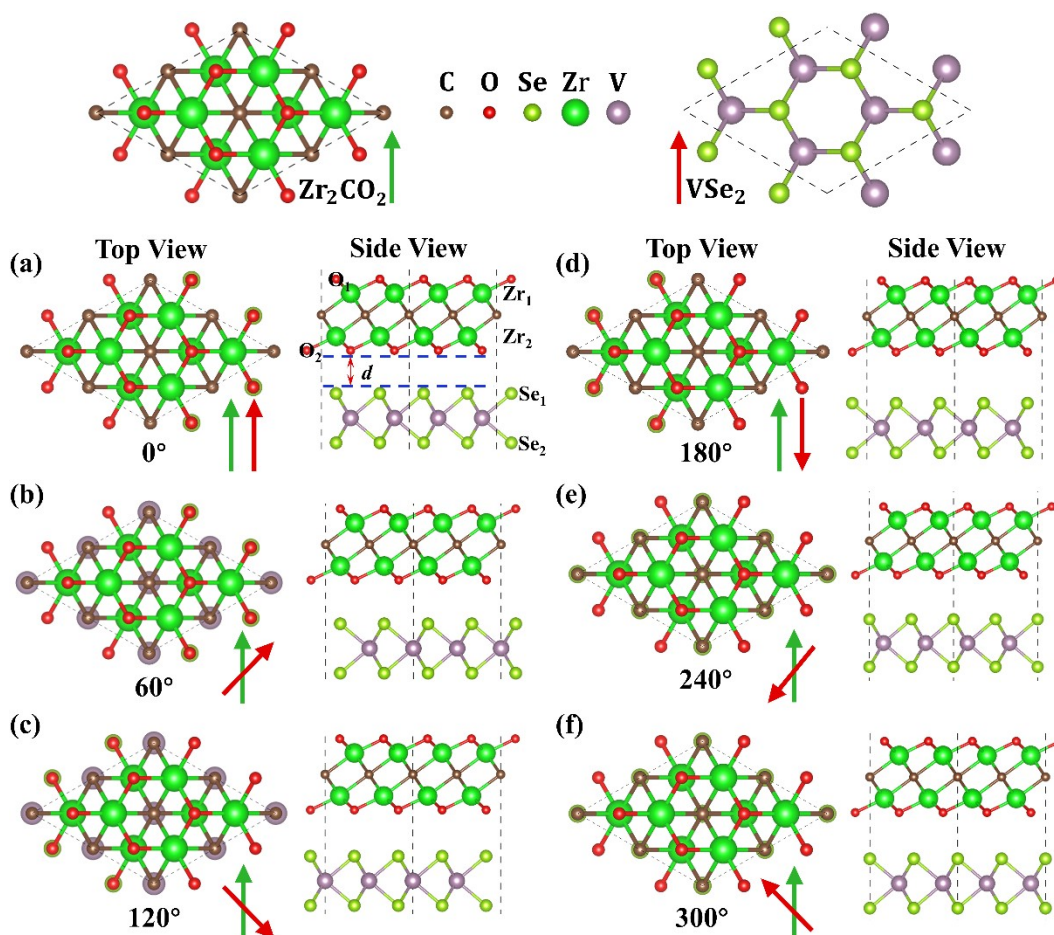

**Fig. S1** Schematic representations of symmetric  $Zr_2CO_3/VSe_2$  heterostructure, illustrating the correlation between different patterns and their respective stacking angles: (a)  $0^\circ$  for T1, (b)  $60^\circ$  for T2, (c)  $120^\circ$  for T3, (d)  $180^\circ$  for T4, (e)  $240^\circ$  for T5, and (f)  $300^\circ$  for T6.

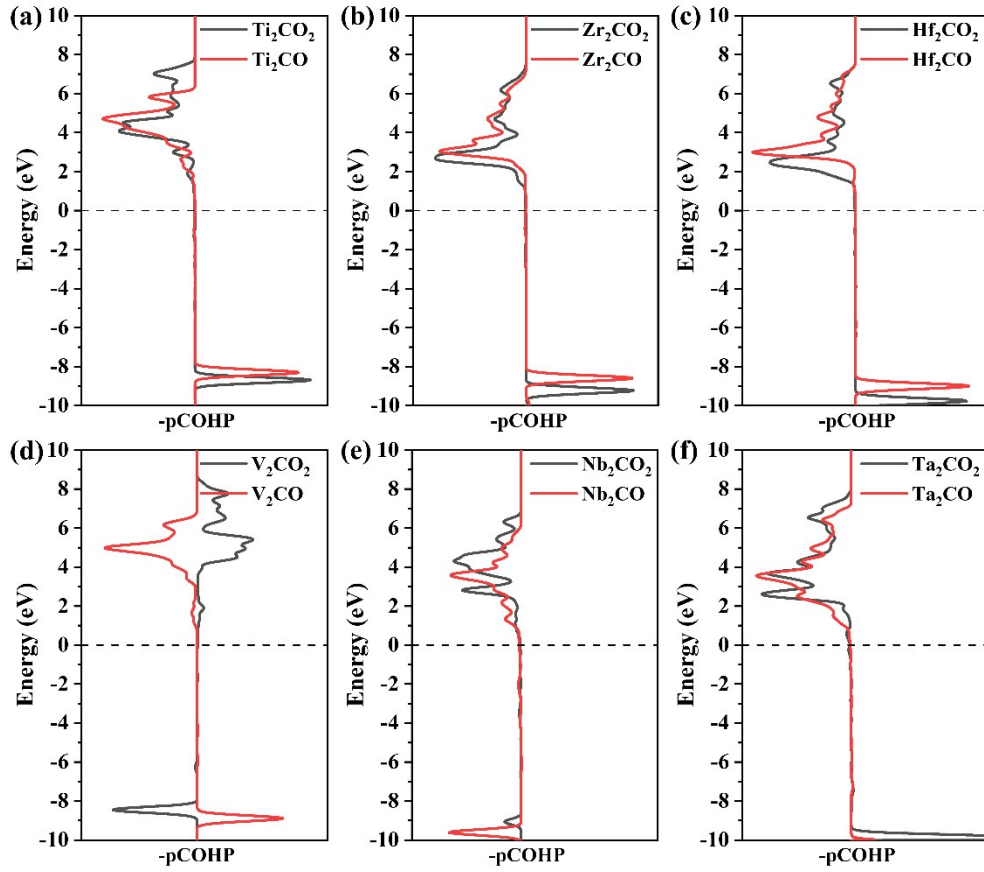

**Fig. S2** Calculated partial crystal orbital hamilton population (pCOHP) for H–O bonds in hydrogen-adsorbed structures: (a)  $\text{Ti}_2\text{CO}_2$  vs.  $\text{Ti}_2\text{CO}$ , (b)  $\text{Zr}_2\text{CO}_2$  vs.  $\text{Zr}_2\text{CO}$ , (c)  $\text{Hf}_2\text{CO}_2$  vs.  $\text{Hf}_2\text{CO}$ , (d)  $\text{V}_2\text{CO}_2$  vs.  $\text{V}_2\text{CO}$ , (e)  $\text{Nb}_2\text{CO}_2$  vs.  $\text{Nb}_2\text{CO}$ , (f)  $\text{Ta}_2\text{CO}_2$  vs.  $\text{Ta}_2\text{CO}$ .

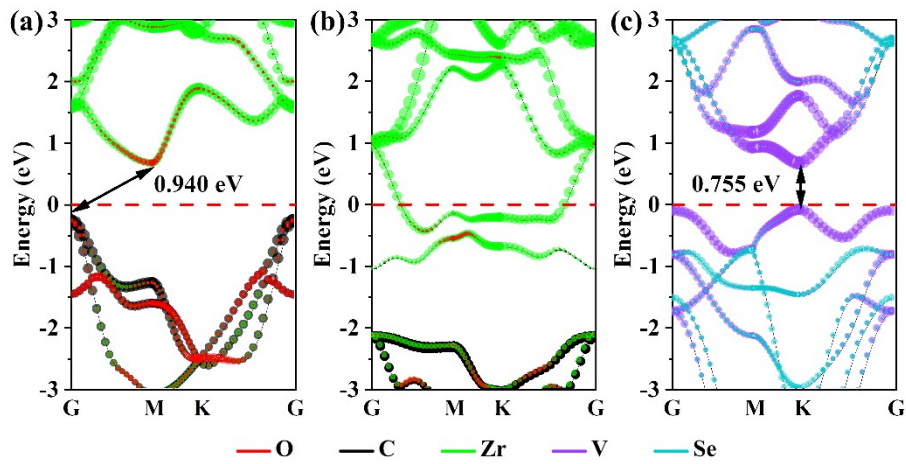

**Fig. S3** Band structure diagrams of (a)  $\text{Zr}_2\text{CO}_2$ , (b)  $\text{Zr}_2\text{CO}$ , and (c)  $\text{VSe}_2$ .

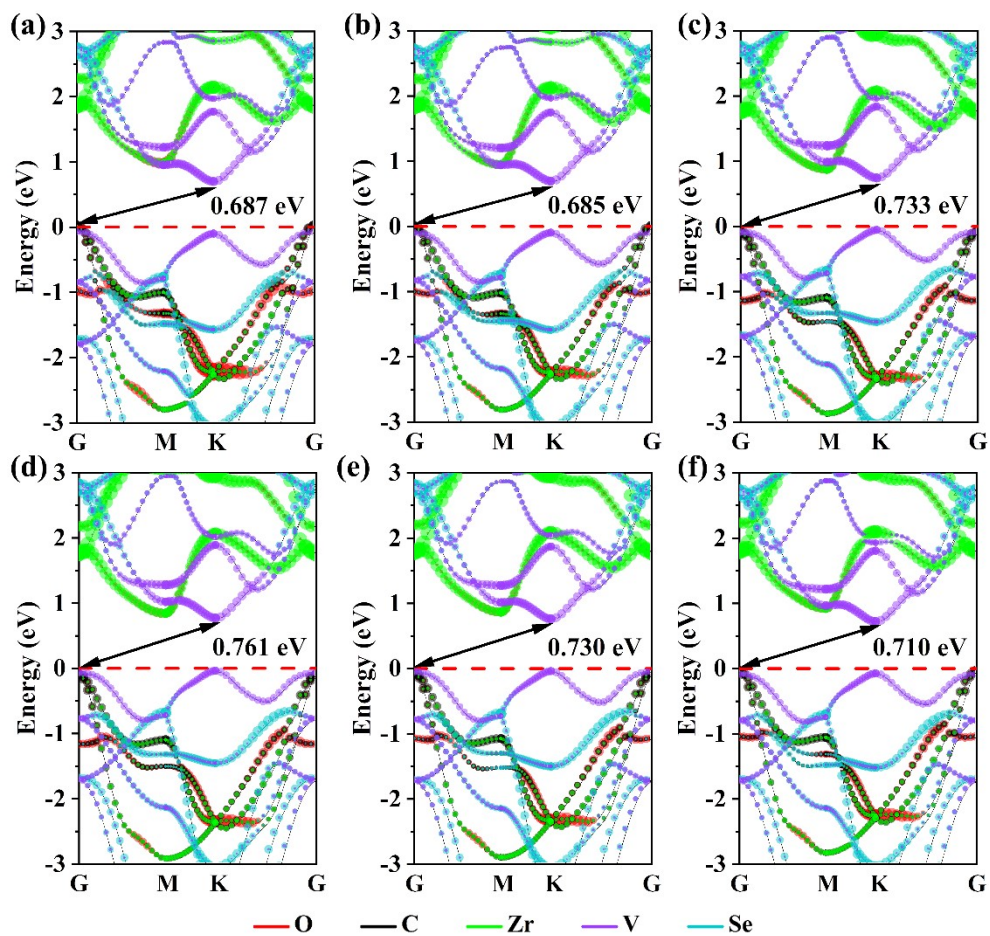

**Fig. S4** Band structure diagrams for the  $\text{Zr}_2\text{CO}_2/\text{VSe}_2$  heterostructure in various configurations: (a) T1, (b) T2, (c) T3, (d) T4, (e) T5, and (f) T6.

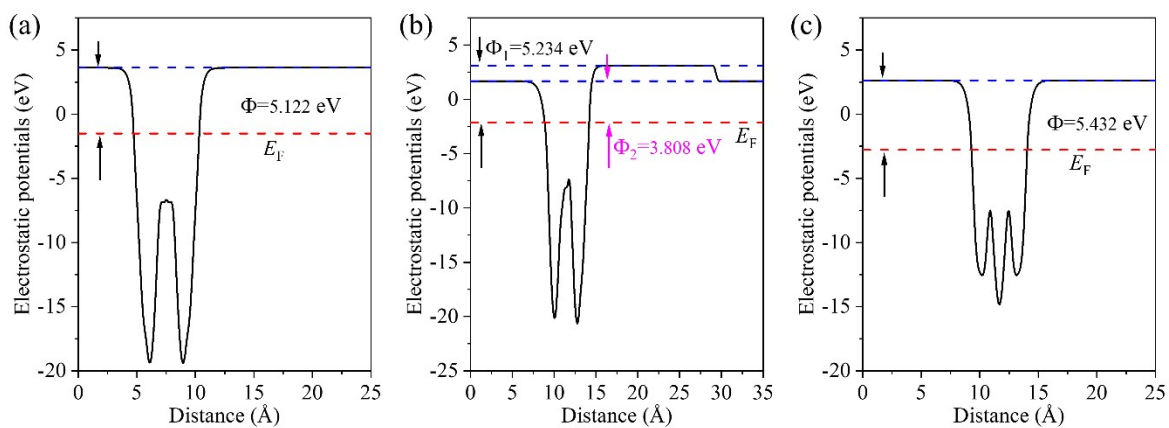

**Fig. S5** Work function diagrams for  $\text{Zr}_2\text{CO}_2$ ,  $\text{Zr}_2\text{CO}$ , and  $\text{VSe}_2$ .



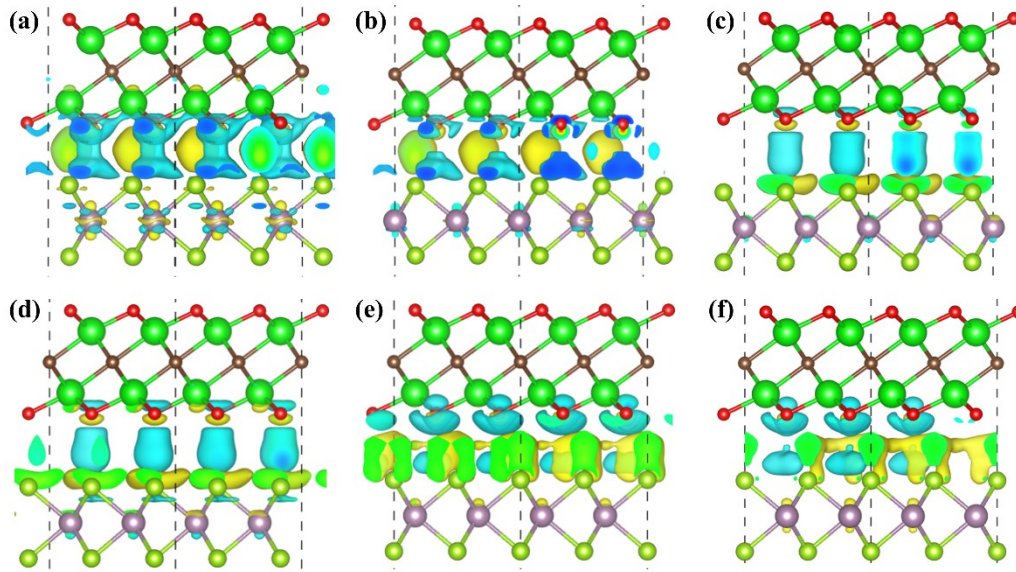

**Fig. S6** Three-dimensional charge density difference for the  $\text{Zr}_2\text{CO}_2/\text{VSe}_2$  heterostructure in various configurations: (a) T1, (b) T2, (c) T3, (d) T4, (e) T5, and (f) T6, illustrating charge accumulation (yellow) and depletion (cyan) with an iso-surface value of  $0.0001 \text{ e}/\text{\AA}^3$ .

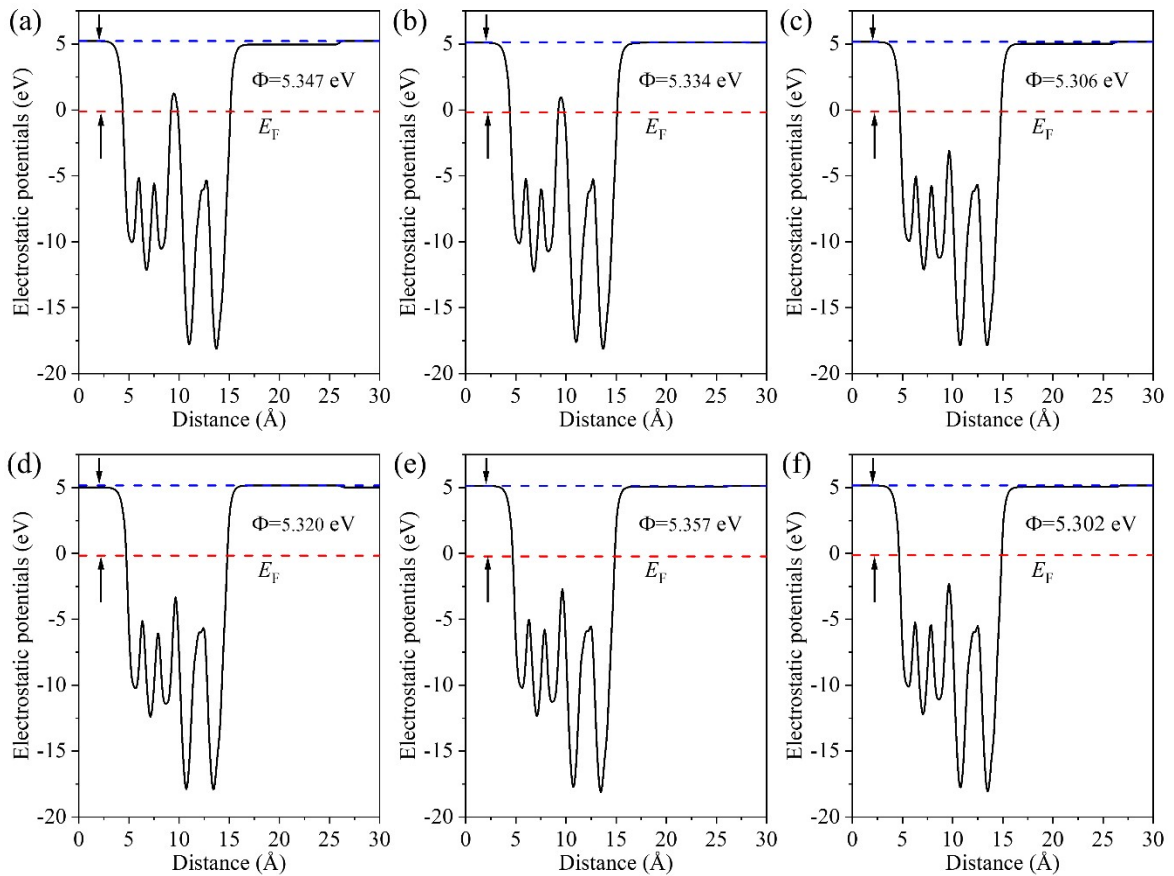

**Fig. S7** Work functions of the  $\text{Zr}_2\text{CO}/\text{VSe}_2$  heterostructure in various stacking configurations: (a) T1, (b) T2, (c) T3, (d) T4, (e) T5, and (f) T6.

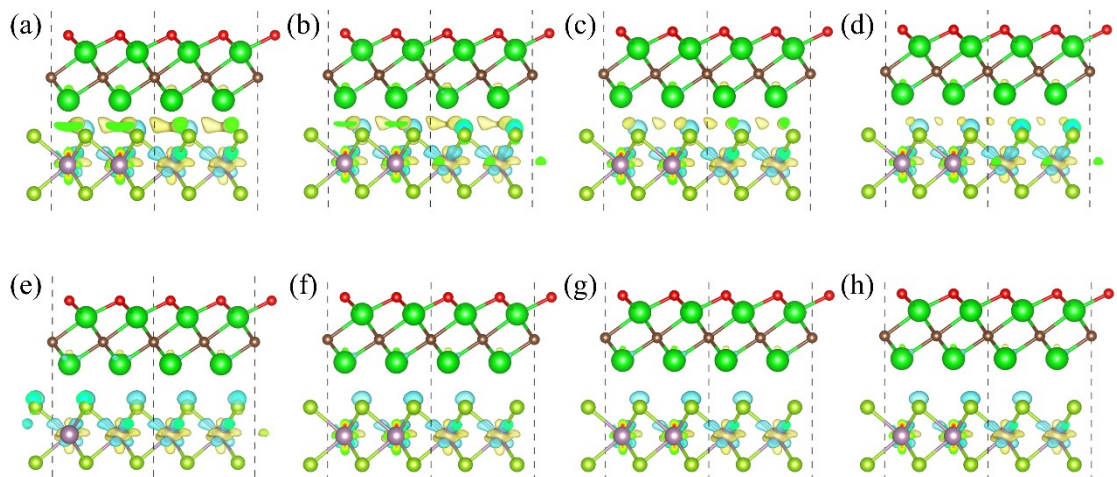

**Fig. S8** Three-dimensional charge density differences for the T4 configuration of the  $\text{Zr}_2\text{CO}/\text{VSe}_2$  heterostructure at various interlayer spacings: (a) 2.0 Å, (b) 2.1 Å, (c) 2.2 Å, (d) 2.3 Å, (e) 2.4 Å, (f) 2.5 Å, (g) 2.6 Å, (h) 2.7 Å. The charge accumulation/depletion is shown in yellow/cyan with an iso-surface of  $0.005 \text{ e}/\text{Å}^3$ .

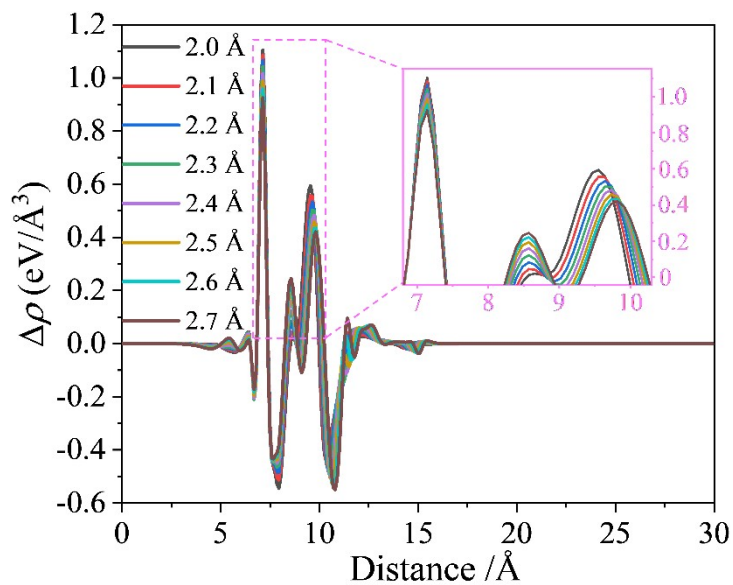

**Fig. S9** Planar-averaged charge density difference for the T4 configuration at different interlayer spacings.

**Table S1** Lattice constants of  $Zr_2CO_2$ ,  $Zr_2CO$  and  $VSe_2$ 

| Structure  | $a/\text{\AA}$ | $b/\text{\AA}$ | $\alpha/^\circ$ | $\beta/^\circ$ | $\gamma/^\circ$ |
|------------|----------------|----------------|-----------------|----------------|-----------------|
| $Zr_2CO_2$ | 3.290          | 3.290          | 90              | 90             | 120             |
| $Zr_2CO$   | 3.263          | 3.263          | 90              | 90             | 120             |
| $VSe_2$    | 3.319          | 3.319          | 90              | 90             | 120             |

**Table S2** Lattice parameters, interlayer spacings, binding energies, and  $\Delta G_{H^*}$  values for the  $Zr_2CO_2/VSe_2$  heterostructure at various stacking angles

| Structures | Rotation angle ( $^\circ$ ) | Lattice parameters ( $\text{\AA}$ ) | Layer spacing ( $\text{\AA}$ ) | Binding energy ( $\text{meV}/\text{\AA}^2$ ) | $\Delta G_{H^*}$ (eV) |         |
|------------|-----------------------------|-------------------------------------|--------------------------------|----------------------------------------------|-----------------------|---------|
|            |                             |                                     |                                |                                              | O side                | Se side |
| T1         | 0                           | 6.589                               | 2.810                          | -14.289                                      | 0.725                 | 0.660   |
| T2         | 60                          | 6.596                               | 2.844                          | -20.343                                      | 0.759                 | 0.657   |
| T3         | 120                         | 6.605                               | 3.002                          | -25.631                                      | 0.828                 | 0.673   |
| T4         | 180                         | 6.580                               | 3.336                          | -7.193                                       | 0.804                 | 0.674   |
| T5         | 240                         | 6.581                               | 2.966                          | -12.866                                      | 0.810                 | 0.673   |
| T6         | 300                         | 6.604                               | 3.005                          | -25.524                                      | 0.805                 | 0.672   |

**Table S3** Bader charges of the T4 configuration across varying interlayer spacings

| Layer spacing / $\text{\AA}$ | Bader charges /e |                 |       |                 |                 |        |                 |
|------------------------------|------------------|-----------------|-------|-----------------|-----------------|--------|-----------------|
|                              | O                | Zr <sub>1</sub> | C     | Zr <sub>2</sub> | Se <sub>1</sub> | V      | Se <sub>2</sub> |
| 2.0                          | 7.263            | 9.804           | 5.982 | 10.375          | 7.066           | 11.945 | 6.564           |
| 2.1                          | 7.264            | 9.809           | 5.992 | 10.400          | 7.029           | 11.941 | 6.565           |
| 2.2                          | 7.265            | 9.812           | 5.998 | 10.392          | 7.034           | 11.934 | 6.566           |
| 2.3                          | 7.262            | 9.815           | 5.999 | 10.421          | 7.008           | 11.929 | 6.567           |
| 2.4                          | 7.260            | 9.816           | 6.000 | 10.441          | 6.991           | 11.923 | 6.568           |
| 2.5                          | 7.255            | 9.812           | 6.012 | 10.467          | 6.967           | 11.918 | 6.569           |
| 2.6                          | 7.256            | 9.800           | 6.025 | 10.490          | 6.946           | 11.912 | 6.571           |
| 2.7                          | 7.260            | 9.802           | 6.018 | 10.518          | 6.925           | 11.904 | 6.574           |
